# Supplementary material for: Does Antimicrobial Therapy Affect Mortality of Patients with Carbapenem-Resistant Klebsiella pneumoniae Bacteriuria? A Nationwide Multicenter Study in Taiwan
Source: PubMed Central journal article supplement (PMC7767250; doi:10.3390/microorganisms8122035), 2020-12-19
Supplement: microorganisms-08-02035-s001.pdf [file microorganisms-08-02035-s001.pdf]

**Table S1.** Mortality of patients according to antimicrobials administered.

| Antimicrobial Regimen                             | Number of patients |          |      | 14-Day Mortality (%) |
|---------------------------------------------------|--------------------|----------|------|----------------------|
|                                                   | Total              | Survived | Died |                      |
| Inappropriate antimicrobial therapy               | 93                 | 75       | 12   | 13.8%                |
| No treatments                                     | 19                 | 18       | 1    | 5.3%                 |
| Antimicrobial regimens not <i>in vitro</i> active | 68                 | 57       | 11   | 16.2%                |
| Tigecycline                                       | 6                  | 5        | 1    | 16.7%                |
| Appropriate antimicrobial therapy                 | 33                 | 30       | 3    | 9.1%                 |
| Amikacin/Gentamicin                               | 16                 | 16       | 0    | 0.0%                 |
| Colistin                                          | 10                 | 7        | 3    | 30.0%                |
| Carbapenem                                        | 1                  | 1        | 0    | 0.0%                 |
| Ciprofloxacin/Levofloxacin                        | 4                  | 4        | 0    | 0.0%                 |
| Trimethoprim/sulfamethoxazole                     | 1                  | 1        | 0    | 0.0%                 |
| Cefepime + Trimethoprim/sulfamethoxazole          | 1                  | 1        | 0    | 0.0%                 |

**Table S2.** Antimicrobial susceptibility of the CRKP isolates.

| Antimicrobial agent           | MIC <sup>a</sup> range<br>( $\mu\text{g}/\text{mL}$ ) | MIC <sub>50</sub> <sup>b</sup><br>( $\mu\text{g}/\text{mL}$ ) | MIC <sub>90</sub> <sup>c</sup><br>( $\mu\text{g}/\text{mL}$ ) | No. (%) of<br>isolates<br>susceptible |
|-------------------------------|-------------------------------------------------------|---------------------------------------------------------------|---------------------------------------------------------------|---------------------------------------|
| Ciprofloxacin                 | $\leq 0.06 - \geq 4$                                  | $\geq 4$                                                      | $\geq 4$                                                      | 7 (5.6)                               |
| Levofloxacin                  | $\leq 0.50 - \geq 8$                                  | $\geq 8$                                                      | $\geq 8$                                                      | 12 (9.5)                              |
| Piperacillin-tazobactam       | $16 - \geq 128$                                       | $\geq 128$                                                    | $\geq 128$                                                    | 1 (0.8)                               |
| Ceftriaxone                   | $\geq 32$                                             | $\geq 32$                                                     | $\geq 32$                                                     | 0 (0)                                 |
| Ceftazidime                   | $8 - \geq 32$                                         | $\geq 32$                                                     | $\geq 32$                                                     | 2 (1.6)                               |
| Cefepime                      | $\leq 1 - \geq 32$                                    | $\geq 32$                                                     | $\geq 32$                                                     | 10 (7.9)                              |
| Amikacin                      | $\leq 4 - \geq 64$                                    | $\leq 4$                                                      | $\geq 64$                                                     | 95 (75.4)                             |
| Gentamicin                    | $\leq 1 - \geq 16$                                    | $\leq 1$                                                      | $\geq 16$                                                     | 67 (53.2)                             |
| Ertapenem                     | $\leq 0.25 - \geq 8$                                  | $\geq 8$                                                      | $\geq 8$                                                      | 3 (2.4)                               |
| Imipenem                      | $1 - \geq 8$                                          | $\geq 8$                                                      | $\geq 8$                                                      | 2 (1.6)                               |
| Meropenem                     | $\leq 0.25 - \geq 8$                                  | $\geq 8$                                                      | $\geq 8$                                                      | 21 (16.7)                             |
| Doripenem                     | $\leq 0.25 - \geq 8$                                  | $\geq 4$                                                      | $\geq 8$                                                      | 23 (18.3)                             |
| Colistin                      | $\leq 0.5 - \geq 4$                                   | $\leq 0.5$                                                    | $\geq 4$                                                      | 109 (86.5)                            |
| Tigecycline                   | $\leq 0.25 - \geq 4$                                  | 0.5                                                           | 2                                                             | 117 (92.9)                            |
| Trimethoprim/sulfamethoxazole | $\leq 0.50 - \geq 4$                                  | $\geq 4$                                                      | $\geq 4$                                                      | 26 (20.6)                             |

<sup>a</sup>MIC: minimal inhibitory concentration.

<sup>b</sup>MIC<sub>50</sub>: MIC for 50% of isolates.

<sup>c</sup>MIC<sub>90</sub>: MIC for 90% of isolates.

**Table S3.** Univariate and multivariate Cox regression analysis of risk factors of 28-day mortality for patients with CRKP bacteriuria

| Variable                          | Univariate        |         | Multivariate     |         |
|-----------------------------------|-------------------|---------|------------------|---------|
|                                   | HR (95% CI)       | p value | HR (95% CI)      | p value |
| Age                               | 1.00 (0.97–1.02)  | 0.851   | 1.00 (0.97–1.02) | 0.889   |
| Male sex                          | 1.56 (0.72–3.36)  | 0.257   | 2.57 (1.06–6.24) | 0.037   |
| Heart failure                     | 1.78 (0.82–3.83)  | 0.144   | 1.06 (0.46–2.47) | 0.889   |
| Immunocompromised state           | 2.82 (1.13–7.04)  | 0.026   | 2.99 (0.99–8.99) | 0.052   |
| APACHE II score $\geq 20$         | 1.10 (1.05–1.16)  | <0.001  | 3.05 (1.21–7.69) | 0.018   |
| Appropriate antimicrobial therapy | 0.92 (0.41–2.05)  | 0.835   | 0.97 (0.41–2.27) | 0.935   |
| Shock                             | 4.82 (1.62–14.30) | 0.005   | 2.27 (0.66–7.81) | 0.195   |

Abbreviations: APACHE, Acute Physiology and Chronic Health Evaluation.

**Table S4.** Univariate and multivariate Cox regression analysis of risk factors for 14-day mortality among patients with CRKP bacteriuria who had fever or  $\geq 2$  of SIRS criteria.

| Variable                          | Univariate        |         | Multivariate      |         |
|-----------------------------------|-------------------|---------|-------------------|---------|
|                                   | HR (95% CI)       | p value | HR (95% CI)       | p value |
| Age                               | 1.00 (0.96–1.03)  | 0.828   | 0.99 (0.95–1.04)  | 0.788   |
| Male sex                          | 1.11 (0.39–3.15)  | 0.851   | 2.26 (0.68–7.53)  | 0.184   |
| Diabetes mellitus                 | 3.97 (0.89–17.73) | 0.071   | 4.48 (0.91–22.12) | 0.066   |
| Heart failure                     | 2.13 (0.75–6.07)  | 0.158   | 1.31 (0.42–4.06)  | 0.646   |
| APACHE II score $\geq 20$         | 4.84 (1.08–21.62) | 0.039   | 3.34 (0.60–18.57) | 0.168   |
| Appropriate antimicrobial therapy | 0.57 (0.16–2.06)  | 0.394   | 0.71 (0.14–3.68)  | 0.708   |
| Shock                             | 3.86 (1.07–13.88) | 0.039   | 2.94 (0.71–12.26) | 0.138   |

Abbreviations: APACHE, Acute Physiology and Chronic Health Evaluation.

**Table S5.** Univariate and multivariate Cox regression analysis of risk factors for 28-day mortality among patients with CRKP bacteriuria who had fever or  $\geq 2$  of SIRS criteria.

| Variable                          | Univariate        |         | Multivariate      |         |
|-----------------------------------|-------------------|---------|-------------------|---------|
|                                   | HR (95% CI)       | p value | HR (95% CI)       | p value |
| Age                               | 1.00 (0.96–1.03)  | 0.828   | 0.99 (0.95–1.03)  | 0.478   |
| Male sex                          | 1.11 (0.39–3.15)  | 0.851   | 1.45 (0.48–4.36)  | 0.508   |
| Heart failure                     | 2.13 (0.75–6.07)  | 0.158   | 1.32 (0.41–4.24)  | 0.645   |
| APACHE II score $\geq 20$         | 4.84 (1.08–21.62) | 0.039   | 3.66 (0.72–18.77) | 0.119   |
| Appropriate antimicrobial therapy | 0.57 (0.16–2.06)  | 0.394   | 0.56 (0.12–2.65)  | 0.461   |
| Shock                             | 3.86 (1.07–13.88) | 0.039   | 2.54 (0.65–9/90)  | 0.178   |

Abbreviations: APACHE, Acute Physiology and Chronic Health Evaluation.

**Table S6.** Univariate and multivariate Cox regression analysis of risk factors for 28-day mortality of non critically ill patients with CRKP bacteriuria.

| Variable                          | Univariate         |         | Multivariate       |         |
|-----------------------------------|--------------------|---------|--------------------|---------|
|                                   | HR (95% CI)        | p value | HR (95% CI)        | p value |
| Age                               | 1.02 (0.97–1.08)   | 0.372   | 0.99 (0.94–1.04)   | 0.656   |
| Male sex                          | 5.69 (0.70–46.24)  | 0.104   | 6.52 (0.71–59.69)  | 0.097   |
| Immunocompromised state           | 11.08 (2.21–55.46) | 0.003   | 12.33 (2.08–73.15) | 0.006   |
| Appropriate antimicrobial therapy | 0.92 (0.22–3.85)   | 0.909   | 0.86 (0.20–3.78)   | 0.839   |
